# Supplementary material for: Assessing Patient Perspectives on Satisfaction Motivations and Reasons for Choosing Pharmacist Administered COVID-19 Vaccination in Community Pharmacies in Abuja Nigeria
Source: Research Square preprint supplement (doi:10.21203/rs.3.rs-7367804/v1), 2025-09-25
Supplement: Supplementary file 1 [file 02dae9309bbdc613a50e2da4.docx]

**Questionnaire**

Thank you for deciding to take part in our study. Evaluating your responses will help us continue to improve COVID-19 vaccination as a service.

Before we can begin the actual survey, you must confirm that you have read and understood the information on the back of the invitation letter. You will find a consent question at the bottom of this page. You can tick Yes/No

If you have any questions about this study, please get in touch with the specified contact person. The vaccinating pharmacies currently have no capacity to support you in completing the questionnaire.

Do you agree to this data collection? • Yes • No

With my consent to data collection, I confirm as a participant.

- I have read and understood the study information on the back of the invitation
- I meet the conditions for participation stated in the information section and I am aware that the requirements and restrictions stated must be observed.
- I had enough time to decide about my participation
- I am participating in the study voluntarily and agree that my data will be processed as described above.

**Demographics**

1. Name of Pharmacy? ………………………………………….
2. How old are you?
3. Gender

- Male
- Female
- Prefer Not to Say

1. What is your highest acquired level of education?

- Uneducated
- Primary
- Secondary
- Graduate
- Post Graduate

1. Do you belong to a specific target risk group for COVID vaccination? [Source](https://www.nhs.uk/conditions/coronavirus-covid-19/people-at-higher-risk/who-is-at-high-risk-from-coronavirus/)

- Down's syndrome
- certain types of cancer (such as a blood cancer like leukaemia or lymphoma)
- sickle cell disease
- certain conditions affecting your blood
- chronic kidney disease (CKD) stage 4 or 5
- severe liver disease
- had an organ or bone marrow transplant
- certain autoimmune or inflammatory conditions (such as rheumatoid arthritis or inflammatory bowel disease)
- HIV or AIDS and have a weakened immune system
- a condition affecting your immune system
- a rare condition affecting the brain or nerves (multiple sclerosis, motor neurone disease, Huntington’s disease or myasthenia gravis)
- a severe problem with the brain or nerves, such as cerebral palsy
- severe or multiple learning disabilities (or you're on the learning disability register)
- a weakened immune system due to a medical treatment (such as steroid medicine, biological therapy, chemotherapy or radiotherapy)
- aged 60 or over – your risk increases as you get older
- pregnant not vaccinated against COVID-19

1. What vaccine did you receive from the pharmacy?

- Moderna. Spikevax.
- Pfizer/BioNTech. Comirnaty.
- Gamaleya. Sputnik V.
- Janssen (Johnson & Johnson) Jcovden.
- Oxford/AstraZeneca. Vaxzevria.
- Serum Institute of India. Covishield (Oxford/ AstraZeneca formulation)
- Sinopharm (Beijing) Covilo.

1. Have you received any vaccine aside COVID-19 Vaccine in the past? • Yes • No (if yes, please mention in text)

**SARS-Cov-2 infection status of study participants Pre-vaccination**

1. Presumed COVID 19 infections? • Yes • No
2. Interval between presumed COVID-19 infection and vaccination

- 1- 3month
- 3-6 months
- >6-9months
- - 12months
- 12-15 months

1. Confirmed COVID-19 Infections • Yes • No

**Satisfaction**

*First of all, we want to know your satisfaction with the service. Please rate how much the following statements apply to you. If you cannot answer a question, please indicate*.

1. Were you comfortable with the COVID vaccination being done in a pharmacy? • Yes • No
2. Were you satisfied with the injection technique at the pharmacy? • Yes • No
3. Were you satisfied with the preliminary discussion about the COVID vaccination prior to the vaccination? • Yes • No.
4. Do you agree that pharmacists/pharmacies are well informed about COVID vaccines? •Strongly Agree • Agree • Neutral • Disagree • Strongly Disagree
5. Were you satisfied with the premises (i.e setting of the pharmacy) used for COVID vaccination? • Yes • No
6. Would recommend COVID vaccination at the pharmacy? • Yes • No
7. Were you satisfied with the type of COVID vaccine that was available? • Yes • No
8. Were you satisfied with the way the appointment was made with the pharmacist? • Yes • No
9. Is there anything you would like changed about the current service? Yes, No. If yes, comment…
10. In your opinion, what do you find most satisfying about receiving COVID-19 vaccine in the community pharmacy?

**Motivation**

*Below we would like to know your reasons for the COVID-19 Vaccination. Please rate how much the following statements apply to you. If you don’t want to answer a question - please indicate.*

1. I want to reduce my own risk of contracting the coronavirus. • Yes • No
2. My job puts me at higher risk of contracting the coronavirus. • Yes • No
3. I want to protect others from being infected with the coronavirus through me. • Yes • No
4. I work with people who need to be protected from coronavirus infection (e.g., the elderly, the sick, nursing home residents). • Yes • No
5. I would like to be less restricted in everyday life. • Yes • No
6. I would like to be able to travel abroad again soon. • Yes • No
7. I would like to follow the recommendations of the Federal Ministry of Health (FMOH Nigeria) • Yes • No
8. I would be willing to have an annual booster vaccination (if needed). • Yes • No
9. I would be willing to come to the pharmacy for an annual booster vaccination (if needed). • Yes • No
10. I did an antibody test before deciding to vaccinate. • Yes • No
11. If possible, I would welcome being able to confirm the effect of the vaccination with an antibody test.; • Yes • No
12. State any other reasons not mentioned above……..

**Reasons for choosing community pharmacy**

In the following, we would like to know your reasons for choosing a pharmacy as a place for vaccination. Please rate how much the following statements apply to you. If you cannot answer a question – for example because it does not apply to your specific situation – you can select ‘cannot be answered”

1. Because the community pharmacy was the only vaccination centre available to me. • Yes • No
2. Because the opening hours of the community pharmacy suit me. • Yes • No
3. Because the community pharmacy is easily accessible for me (e.g., parking, public transport connection). • Yes • No
4. Because I have already had good experiences with vaccinations at the community pharmacy. • Yes • No
5. . Because my physician/clinic vaccinator is not available and accessible. • Yes • No
6. Because I trust the community pharmacy. • Yes • No
7. Would you have had the COVID vaccination done elsewhere(outside community pharmacy) ?

• Yes • No

1. Have you had any vaccination (including other vaccinations apart from COVID-19) at a community pharmacy ?

• Yes • No

If Yes, which vaccination………

If No, would you recommend that other vaccination services be made available through community pharmacies… Yes/No

Supplementary Question

**Adverse Events Following Immunisation Question( Relevant after the first dose administration)**

1. Did you observe any of these symptoms after the vaccination? Tick the time you observe the symptoms.

| Adverse Events | First Dose | Second Dose | Third/Booster Dose |
| --- | --- | --- | --- |
| Injection site swelling |  |  |  |
| pain at injection site |  |  |  |
| Fatigue or tiredness |  |  |  |
| Headache |  |  |  |
| Myalgia(Muscle painl) |  |  |  |
| Chills and rigor( Unstable body temperature) |  |  |  |
| increased appetite |  |  |  |
| Loss of appetite |  |  |  |
| Nausea and vomiting |  |  |  |
| Fever |  |  |  |
| Joint Pain |  |  |  |
| Bitter taste in the mouth |  |  |  |
| Others(Please Specify) |  |  |  |

………

1. On a scale of 1-5 how severe were the adverse events

- Very Mild
- Mild
- No Adverse Events
- Severe
- Very Severe

1. Did you report the Adverse Event(s) to the pharmacist who administered the vaccine? • Yes • No

If no, who did you report to………………….

1. Did the way the pharmacist manage the adverse event discourage you from taking vaccines in the future? • Yes • No
2. Did the way the pharmacist manage the adverse event discourage you from taking vaccines at a pharmacy in the future? • Yes • No

**Vaccine Hesitancy**

1. In your opinion, what do you think discourages people from taking/receiving COVID-19 vaccination

Probe - Do you think expanding vaccination services through community pharmacies would reduce COVID-19 hesitancy. Yes. No. If yes, comment.

1. Having received the COVID-19 vaccination, what advice would you give to others who are reluctant to take the vaccine?.........
