# Supplementary material for: Assessing Patient Perspectives on Satisfaction Motivations and Reasons for Choosing Pharmacist Administered COVID-19 Vaccination in Community Pharmacies in Abuja Nigeria
Source: Research Square preprint supplement (doi:10.21203/rs.3.rs-7367804/v1), 2025-09-25
Supplement: Supplementary file 1 [file 88641c2c2eb12a4623087678.pdf]

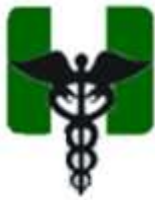

# National Health Research Ethics Committee of Nigeria (NHREC)

Promoting Highest Ethical and Scientific Standards for Health Research in Nigeria

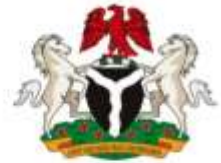

Federal Ministry of Health

NHREC Protocol Number NHREC/01/01/2007-02/04/2023

NHREC Approval Number NHREC/01/01/2007- 19/04/2023

Date: 19 April 2023

**Re: Community Pharmacist-Administered COVID-19 Vaccinations in Abuja, Nigeria: A Patient Survey on Satisfaction and Motivation to Get Vaccinated**

Health Research Committee assigned number: NHREC/01/01/2007

Name of Principal Investigator: Adeyemi, Adebawale Sylvester

Address of Principal Investigator: COVID-19 Mass Vaccination Data Technical Officer

African Field Epidemiology Network

Email: [adeyemisylvester1@gmail.com](mailto:adeyemisylvester1@gmail.com)

Tel: +234 802129 9783/+2348160150126

Date of receipt of valid application: 02/04/2023

Date when final determination of research was made: 19-04-2023

**Notice of Expedited Committee Review and Approval**

This is to inform you that the research described in the submitted protocol, advertisements and other participant information materials have been reviewed and *given expedited committee approval by the National Health Research Ethics Committee.*

This approval dates from 19/04/2023 to 18/04/2024. If there is delay in starting the research, please inform the HREC so that the dates of approval can be adjusted accordingly. Note that no participant accrual or activity related to this research may be conducted outside of these dates. ***All informed consent forms used in this study must carry the HREC assigned number and duration of HREC approval of the study.*** In multiyear research, endeavour to submit your annual report to the HREC early in order to obtain renewal of your approval and avoid disruption of your research.

*The National Code for Health Research Ethics requires you to comply with all institutional guidelines, rules and regulations and with the tenets of the Code including ensuring that all adverse events are reported promptly to the HREC. No changes are permitted in the research without prior approval by the HREC except in circumstances outlined in the Code. The HREC reserves the right to conduct compliance visit to your research site without previous notification.*

Signed

**Professor Zubairu Iliyasu MBBS (UniMaid), MPH (Glasg.), PhD (Shef.), FWACP, FMCPH, FFPH(UK)  
Chairman, National Health Research Ethics Committee of Nigeria (NHREC)**
